# Supplementary material
Source: ML conference proceedings conference paper supplement (https://proceedings.mlr.press/v70/appel17a.html)
Supplement: Supplementary file [file appel17a-supp.pdf]

---

## A Simple Multi-Class Boosting Framework – Supplement

Ron Appel, Pietro Perona

---

**Claim 11:**  $\langle \hat{\mathbf{v}}, \mathbf{1} \rangle^2 \geq 1$

**Proof:** Reformulate as a constrained minimization problem, with  $\mathbf{x} \in \mathbb{R}^N$ :

$$\min_{\mathbf{x}} \langle \mathbf{x}, \mathbf{1} \rangle \quad \text{such that: } \|\mathbf{x}\|^2 = 1, \mathbf{x} \geq \mathbf{0}$$

$$\therefore L = \langle \mathbf{x}, \mathbf{1} \rangle - \lambda(\|\mathbf{x}\|^2 - 1) - \sum_{n=1}^N \mu_n (\langle \mathbf{x}, \boldsymbol{\delta}_n \rangle - 0)$$

$$\text{such that: } \mu_n \geq 0 \quad \forall n$$

$$\therefore \nabla_{\mathbf{x}} L = \mathbf{1} - 2\lambda \mathbf{x} - \sum_{n=1}^N \mu_n \boldsymbol{\delta}_n$$

$$\therefore 2\lambda \mathbf{x}^* = \sum_{n=1}^N (1 - \mu_n) \boldsymbol{\delta}_n$$

$$\therefore \mathbf{x}^* = \frac{\sum_{n=1}^N (1 - \mu_n) \boldsymbol{\delta}_n}{\sqrt{\sum_{n=1}^N (1 - \mu_n)^2}} \quad [\mu_n \leq 1 \quad \forall n]$$

$$\begin{aligned} \therefore \langle \mathbf{x}^*, \mathbf{1} \rangle &= \frac{\sum_{n=1}^N (1 - \mu_n)}{\sqrt{\sum_{n=1}^N (1 - \mu_n)^2}} \geq \frac{\sum_{n=1}^N (1 - \mu_n)^2}{\sqrt{\sum_{n=1}^N (1 - \mu_n)^2}} \\ &= \sqrt{\sum_{n=1}^N (1 - \mu_n)^2} \end{aligned}$$

To have unit norm,  $\mathbf{x}$  must contain at least one non-zero element. Without loss of generality, we assume  $x_1 > 0$ ; and hence:  $\mu_1 = 0$

$$\therefore \langle \mathbf{x}^*, \mathbf{1} \rangle \geq \sqrt{1 + \sum_{n=2}^N (1 - \mu_n)^2} \geq 1$$

Q.E.D.

**Claim 12:**  $\max_i \langle \mathbf{1} - 2\boldsymbol{\delta}_i, \hat{\mathbf{v}} \rangle^2 \geq \frac{4}{N}$  for  $N \geq 4$

Q.E.D.

**Proof:** Reformulate as a constrained minimization problem with  $\mathbf{x} \in \mathbb{R}^N$ . Without loss of generality, assume that  $\langle \mathbf{x}, \mathbf{1} \rangle \geq 0$  and that its first element  $x_1$  is a minimal element (i.e.  $x_1 \leq x_n \quad \forall n$ ).

$$\min_{\mathbf{x}} \langle \mathbf{x}, \mathbf{1} - 2\boldsymbol{\delta}_1 \rangle \quad \text{such that: } \|\mathbf{x}\|^2 = 1, \mathbf{x} \geq x_1 \mathbf{1}$$

$$\therefore L = \langle \mathbf{x}, \mathbf{1} - 2\boldsymbol{\delta}_1 \rangle - \lambda(\|\mathbf{x}\|^2 - 1) - \sum_{n=2}^N \mu_n (\langle \mathbf{x}, \boldsymbol{\delta}_n \rangle - x_1)$$

$$\text{such that: } \mu_n \geq 0 \quad \forall n$$

$$\therefore \nabla_{\mathbf{x}} L = [\mathbf{1} - 2\boldsymbol{\delta}_1] - 2\lambda \mathbf{x} - \sum_{n=2}^N \mu_n \boldsymbol{\delta}_n$$

$$\therefore 2\lambda \mathbf{x}^* = -\boldsymbol{\delta}_1 + \sum_{n=2}^N (1 - \mu_n) \boldsymbol{\delta}_n$$

$$\therefore \mathbf{x}^* = \frac{-\boldsymbol{\delta}_1 + \sum_{n=2}^N (1 - \mu_n) \boldsymbol{\delta}_n}{\sqrt{1 + \sum_{n=2}^N (1 - \mu_n)^2}}$$

$$\therefore \langle \mathbf{x}^*, \mathbf{1} - 2\boldsymbol{\delta}_1 \rangle = \frac{1 + \sum_{n=2}^N (1 - \mu_n)}{\sqrt{1 + \sum_{n=2}^N (1 - \mu_n)^2}}$$

Note that if  $x_n > x_1$  then  $\mu_n = 0$ , and if  $x_n = x_1$  then  $(1 - \mu_n) = -1$ . Let  $M$  be the number of unique indices  $n \geq 2$  for which  $x_n = x_1$ .

$$\therefore \langle \mathbf{x}^*, \mathbf{1} - 2\boldsymbol{\delta}_1 \rangle = \frac{1 + ((N-1) - M) - M}{\sqrt{N}} = \frac{N - 2M}{\sqrt{N}}$$

Since  $\langle \mathbf{x}, \mathbf{1} \rangle \geq 0$

hence:  $-1 + ((N-1) - M) - M \geq 0 \quad \therefore -2M \geq 2 - N$

$$\therefore \langle \mathbf{x}^*, \mathbf{1} - 2\boldsymbol{\delta}_1 \rangle \geq \frac{2}{\sqrt{N}} \quad \therefore \langle \mathbf{x}^*, \mathbf{1} - 2\boldsymbol{\delta}_1 \rangle^2 \geq \frac{4}{N}$$
